# Supplementary material
Source: PubMed Central journal article supplement (PMC9116435)
Supplement: NIHMS1803342-supplement-Table_S1.pdf [file NIHMS1803342-supplement-Table_S1.pdf]

**Table S1.** Measured analytes and their corresponding calibration curve data.

| <b>Analyte</b>                   | <b>Regression line</b> | <b>R<sup>2</sup></b> |
|----------------------------------|------------------------|----------------------|
| <sup>75</sup> As <sup>16</sup> O | $y = 27767x + 6122.6$  | 0.9999               |
| <sup>111</sup> Cd                | $y = 8774.5x + 984.33$ | 1.000                |
| <sup>114</sup> Cd                | $y = 20048x + 2097.9$  | 1.000                |
| <sup>206</sup> Pb                | $y = 16750x + 1876$    | 1.000                |
| <sup>207</sup> Pb                | $y = 14256x + 9130.2$  | 1.000                |
| <sup>208</sup> Pb                | $y = 36007x + 2092.7$  | 1.000                |
